# Supplementary material
Source: PubMed Central journal article supplement (PMC5106870)
Supplement: NIHMS742024-supplement-supp_figure1.pdf [file NIHMS742024-supplement-supp_figure1.pdf]

**Figure 4E**

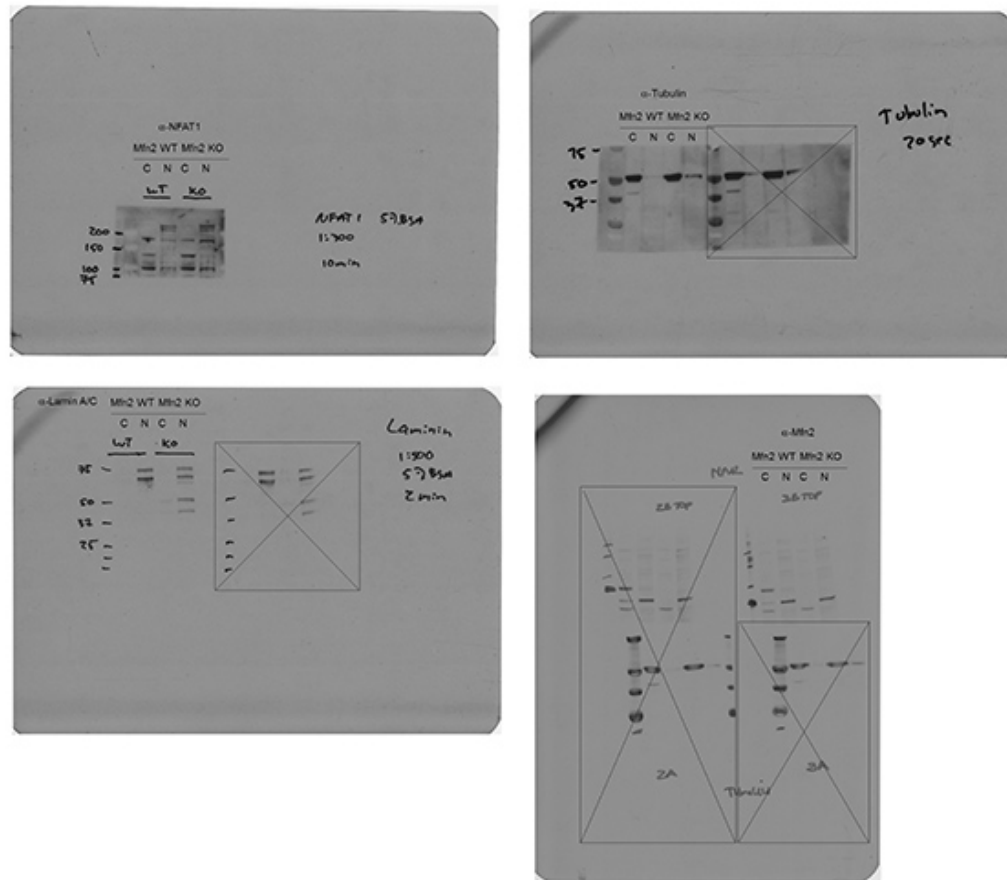

**Figure S2E**

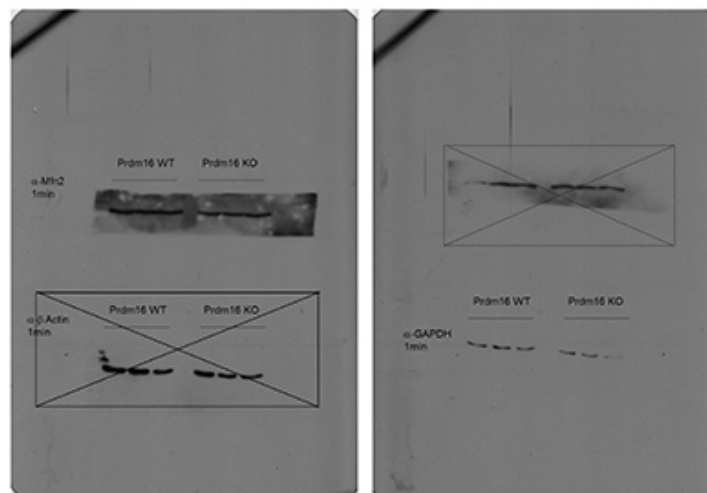

**Supplementary Figure 1:** Original Western Blot scans with size markers for Fig. 4E and Extended Data Fig. 2E. These blots are one representative example out of three independent experiments.
