# Supplementary material
Source: PubMed Central journal article supplement (PMC5106870)
Supplement: NIHMS742024-supplement-supp_guide.pdf [file NIHMS742024-supplement-supp_guide.pdf]

Supplementary Figure 1: Original Western Blot scans for Figure 4E and Extended Data 2E.

Supplementary Table 1: Antibodies used throughout this report.

Supplementary Table 2: Taqman primers used throughout this report.

Supplementary Table 3: Primers for chromatin immunoprecipitation (Extended data Fig. 3D)
