# Supplementary material
Source: PubMed Central journal article supplement (PMC5106870)
Supplement: NIHMS742024-supplement-supp_table1.pdf [file NIHMS742024-supplement-supp_table1.pdf]

**Supplementary Table 1: Antibodies**

| <b>Antibody</b>                                                         | <b>Company</b> | <b>Catalog</b>                                                                                                  |
|-------------------------------------------------------------------------|----------------|-----------------------------------------------------------------------------------------------------------------|
| <i>Peripheral Blood/spleen</i>                                          |                |                                                                                                                 |
| CD3e-Pac Blue                                                           | eBioscience    | 57-0033-82                                                                                                      |
| CD45.2-PerCP 5.5                                                        | BD             | 552950                                                                                                          |
| CD45.1-PE Cy7                                                           | eBioscience    | 25-0453-82                                                                                                      |
| GR1-APC                                                                 | BD             | 553129                                                                                                          |
| CD19-APC Cy7                                                            | BD             | 557655                                                                                                          |
| Mac1-PE                                                                 | eBioscience    | 12-0112-81                                                                                                      |
| <i>Bone Marrow</i>                                                      |                |                                                                                                                 |
| Lineage-FITC (CD2, CD3e, CD4, CD8, Ter119, GR1, B220, CD19, Mac1, CD41) | eBioscience    | 11-0021-85, 11-0031-85, 11-0041-85, 11-0081-85, 11-5921-85, 3010-02, 11-5931-85, 11-0193-85, 11-0112-85, 553848 |
| Flt3-APC                                                                | eBioscience    | 12-1351-83                                                                                                      |
| Sca1-Pac Blue                                                           | BioLegend      | 108120                                                                                                          |
| cKit-APC Cy7                                                            | eBioscience    | 47-1171-82                                                                                                      |
| CD48-A700                                                               | BioLegend      | 103426                                                                                                          |
| CD150-PE Cy7                                                            | BioLegend      | 115913                                                                                                          |
| IL7R $\alpha$ -PE                                                       | BD             | 552543                                                                                                          |
| CD16/32                                                                 | BD             | 560539                                                                                                          |
| CD34                                                                    | BD             | 560230                                                                                                          |
| <i>Thymus</i>                                                           |                |                                                                                                                 |
| CD25-PE                                                                 | BD             | 553866                                                                                                          |
| CD44-APC                                                                | BD             | 559250                                                                                                          |
| CD4-PE-Cy7                                                              | BD             | 552775                                                                                                          |
| CD8 $\alpha$ -PE-Cy7                                                    | BioLegend      | 100713                                                                                                          |
| <i>Immunocytochemistry/Western Blot/ChIP</i>                            |                |                                                                                                                 |
| Rb-anti-NFAT1                                                           | Cell Signaling | 4389S                                                                                                           |
| Rb-anti-Mfn2                                                            | Cell Signaling | 9482                                                                                                            |
| Ms-anti-Mfn2                                                            | Abcam          | ab56889                                                                                                         |
| Ms-anti- $\alpha$ -Tubulin                                              | Sigma          | T9026                                                                                                           |
| Ms-anti-FLAG                                                            | Sigma          | F3165                                                                                                           |

|                         |                   |           |
|-------------------------|-------------------|-----------|
| Ms-anti-GAPDH           | Life Technologies | AM4300    |
| Rb-anti- $\beta$ -actin | Sigma             | A5441     |
| Rb-anti- $\beta$ Gal    | Invitrogen        | A11132    |
| Ms-anti-Tomm20          | Abcam             | ab56783   |
| Ms-anti-RNA Pol II      | Active Motif      | 39097     |
| Ms normal IgG           | Santa Cruz        | sc-2025   |
| Rb normal IgG           | Santa Cruz        | sc-2027 X |

---
