# Supplementary material
Source: PubMed Central journal article supplement (PMC5106870)
Supplement: NIHMS742024-supplement-supp_table2.pdf [file NIHMS742024-supplement-supp_table2.pdf]

**Supplementary Table 2: Taqman primers**

| <b>Taqman<br/>Inventoried Primers</b> | <b>Company</b>     | <b>Catalog Number</b> | <b>Inventor ID Number</b> | <b>Exon/Exon<br/>Junction</b> |
|---------------------------------------|--------------------|-----------------------|---------------------------|-------------------------------|
| Mfn2                                  | Applied Biosystems | 4331182               | Mm00500120_m1             | 5/6                           |
| Mfn1                                  | Applied Biosystems | 4331182               | Mm00612599_m1             | 7/8                           |
| Opa1                                  | Applied Biosystems | 4331182               | Mm01349707_g1             | 16/17                         |
| Drp1                                  | Applied Biosystems | 4331182               | Mm01342903_m1             | 13/14                         |
| Fis1                                  | Applied Biosystems | 4331182               | Mm00481580_m1             | 2/3                           |
| CD150 (SLAMF1)                        | Applied Biosystems | 4351372               | Mm00443316_m1             | 1/2                           |
| IL7Ra                                 | Applied Biosystems | 4331182               | Mm00434295_m1             | 1/2                           |
| Sox4                                  | Applied Biosystems | 4331182               | Mm00486317_s1             | 1/2                           |
| VWF                                   | Applied Biosystems | 4331182               | Mm00550376_m1             | 3/4                           |
| Fli1                                  | Applied Biosystems | 4331182               | Mm00484410_m1             | 7/8                           |
| Prdm16 (total)                        | Applied Biosystems | 4351372               | Mm00712556_m1             | 14/15                         |
| GAPDH                                 | Applied Biosystems | 4352339E              |                           |                               |

  

| <b>Taqman<br/>Custom Primers</b> | <b>Forward</b>                   | <b>Reverse</b>                         | <b>5'-FAM-Internal</b>               | <b>Exon/Exon<br/>Junction</b> |
|----------------------------------|----------------------------------|----------------------------------------|--------------------------------------|-------------------------------|
| FL-Prdm16                        | 5'-<br>TGAAGGAGGCCG<br>ACTTTG-3' | 5'-<br>CCTGGGATGA<br>CACCTCTGTA<br>-3' | 5'-<br>TCCGTCAGCATC<br>TGCTCCCATC-3' | 2/3                           |
