# Supplementary material
Source: PubMed Central journal article supplement (PMC5106870)
Supplement: NIHMS742024-supplement-supp_table3.pdf [file NIHMS742024-supplement-supp_table3.pdf]

**Supplementary Table 3: Mfn2Promoter ChIP Primers**

| <b>Region</b>     | <b>Forward</b>                         | <b>Reverse</b>                        |
|-------------------|----------------------------------------|---------------------------------------|
| R1                | 5'-<br>CCTGAATGTCCTGGGACTGAGTGA-<br>3' | 5'-<br>AGGCAACTAAACAGCAGCCACA-<br>3'  |
| R2                | 5'-TGCCTGATGCGTTGTGGCTG-3'             | 5'-<br>TCCGAGTGTCTTCAAAGGGAACA-<br>3' |
| R3                | 5'-<br>CGGATTATGAAATGCGAGTCTGGA-<br>3' | 5'-GGGCAGGACACGACAAGGGT-<br>3'        |
| R4                | 5'-ACCCTGACGGACGCTGATCCA-3'            | 5'-<br>ACCACAGTGTCTAGGAACTCCGC-<br>3' |
| R5                | 5'-TCAGAGGCCATCGGCTCGTC-3'             | 5'-CACCTTCACCTTCCCGGCCTC-<br>3'       |
| Intergenic<br>ch6 | 5'-ATGGTTGCCACTGGGGATCT-3'             | 5'-TGCCAAAGCCTAGGGGAAGA-<br>3'        |
